# Supplementary material
Source: Research Square preprint supplement (doi:10.21203/rs.3.rs-9105142/v1)
Supplement: Supplementary file 1 [file d8b2b5433aa1155a2f2c6c9a.docx]

**PVA-Concentration-Regulated Conductive Inks for Low-Voltage-Driven Flexible Joule Heating Devices with Tunable Performance and Mechanical Robustness**

Rongrong Yuan*, Yizhe Sun, Xiuzhi Du, LuTao, Xinhui Cui, Zhipeng Li and Xinqun Zhang

School of Electrical Engineering, Chuzhou Polytechnic, Chuzhou,

239000, People’s Republic of China

E-mail:yuanrongrong001@126.com

| **w%** | **PVA**  **(5%)** | **PVA**  **(10%)** | **PVA**  **(15%)** | **PEDOT:PSS** | **Cu@Ag（10%）** | **glycerin** | **BHT** | **SDS** | **CNF** | **SA** |
| --- | --- | --- | --- | --- | --- | --- | --- | --- | --- | --- |
| **No.1** | 20.81 % |  |  | 20.39 % | 20.12 % | 11.07 % | 6.88 % | 1.17 % | 15.97 % | 2.57 % |
| **No.2** |  | 20.75 % |  | 20.51 % | 20.19 % | 12.71 % | 6.08 % | 1.20 % | 15.94 % | 2.52 % |
| **No.3** |  |  | 20.77 % | 20.67 % | 20.35 % | 11.95 % | 6.62 % | 1.19 % | 15.93 % | 2.50 % |

**Table SI** The specific mass ratios of chemical reagents under different formulations

**Table SII** Adhesion Test Standard

| **ISO Grade** | **ASTM Grade** | **Test Result** |
| --- | --- | --- |
| 0 | 5B | The edges of the cuts are completely smooth, and there is no peeling at the grid edges. |
| 1 | 4B | There are small pieces of peeling at the intersections of the cuts, and the actual damage in the grid area does not exceed 5%. |
| 2 | 3B | The edges and/or intersections of the cuts are peeled off, and the area is greater than 5% but less than 15%. |
| 3 | 2B | There is partial peeling along the edges of the cuts or entire large pieces are peeled off, and/or some grids are completely peeled off in pieces. The peeled area exceeds 15% but is less than 35%. |
| 4 | 1B | Large pieces are peeled off at the edges of the cuts/or some grids are partially or completely peeled off, and the area is greater than 35% of the grid area but not more than 65%. |
| 5 | 0B | Exceeds the previous grade. |


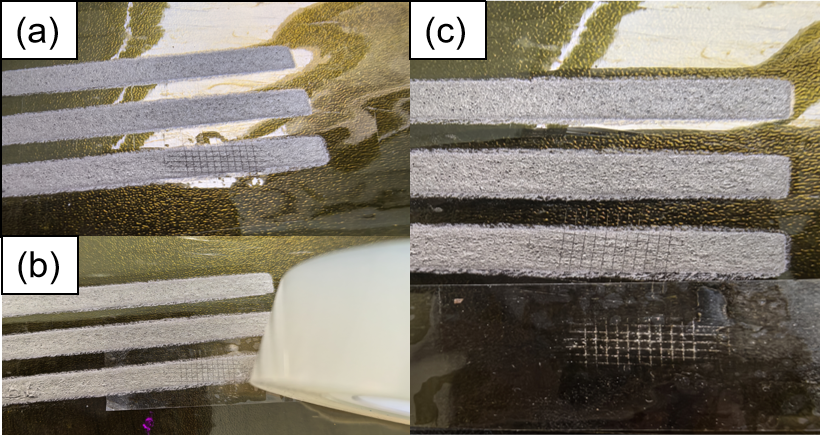


**Figure S1** (a) Image of the ink printed on the PI substrate after cutting; (b) Photo of the 3M tape adhering to the ink on PI substrate; (c) Photo of the 3M tape adhering to the ink on the PI substrate.


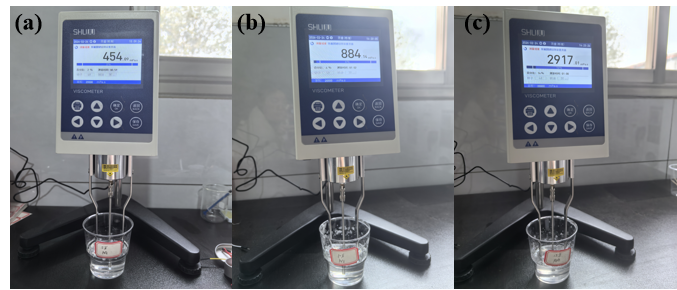


**Figure S2.** Digital photographs of the rotational viscometer measuring the viscosities of the PVA solutions with different concentrations: (a) 5 wt% PVA (454.09 mPa·s), (b) 10 wt% PVA (884.14 mPa·s), and (c) 15 wt% PVA (2917.01 mPa·s).
